# Supplementary material
Source: MDPI journal article supplement (https://www.mdpi.com/2073-4441/14/9/1417)
Supplement: s1 [file s1]

## Supplementary Material

Figure S1. Raman spectra of all tested samples

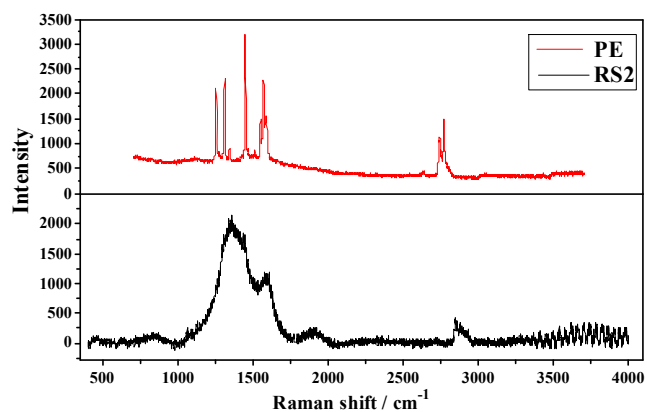

Sample RS2 was identified as PE

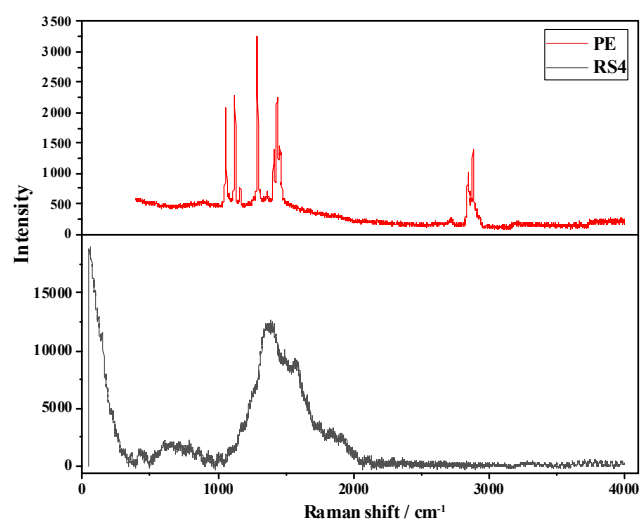

Sample RS4 was identified as PE

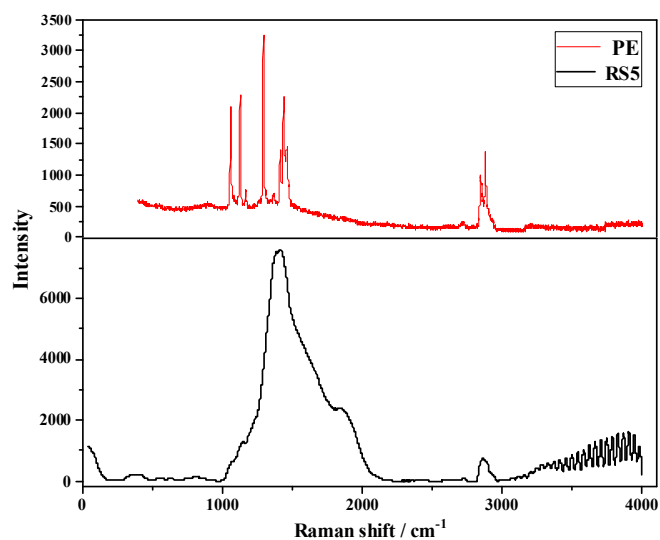

Sample RS5 was identified as PE

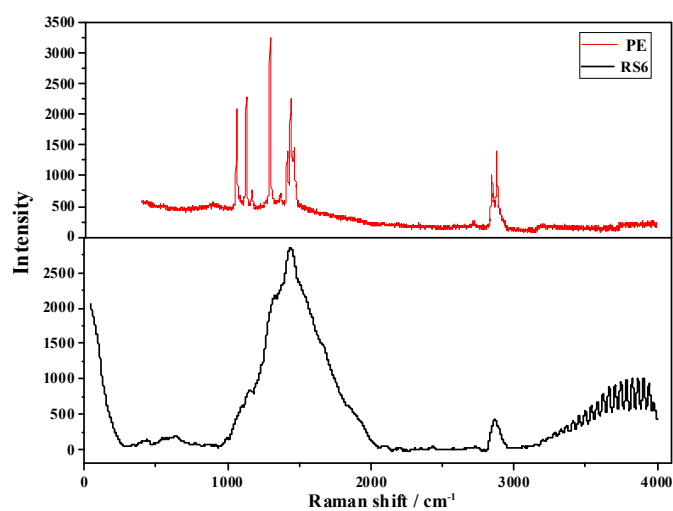

Sample RS6 was identified as PE

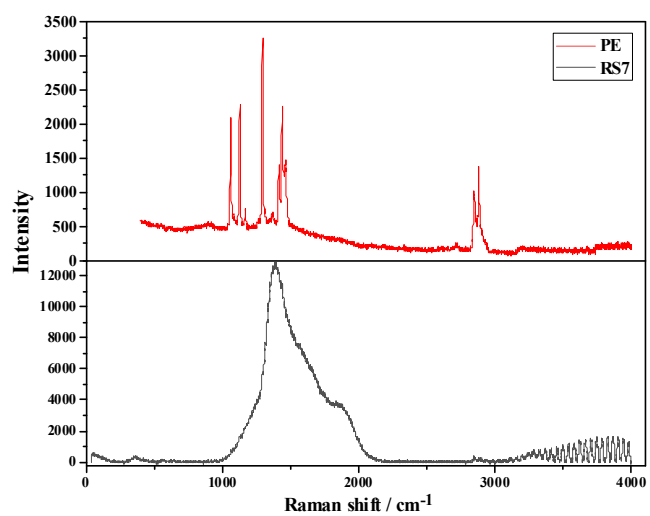

Sample RS7 was identified as PE

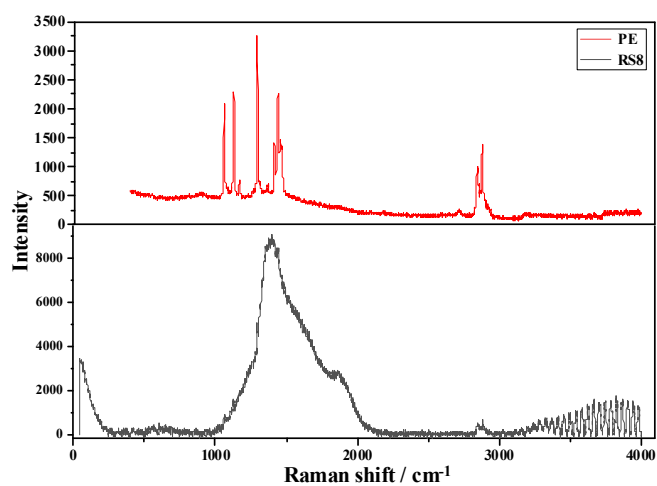

Sample RS8 was identified as PE

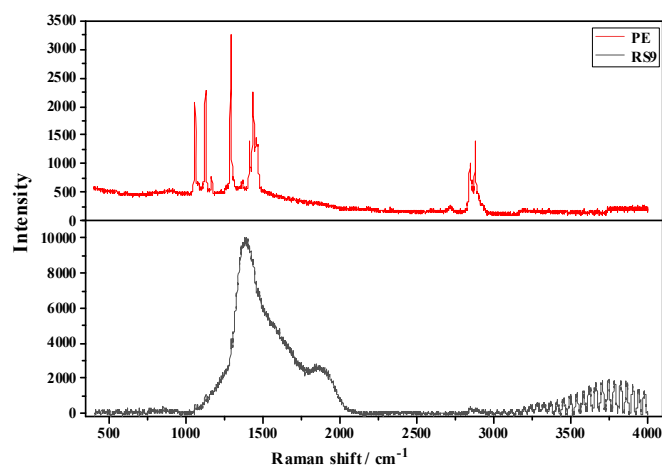

Sample RS9 was identified as PE

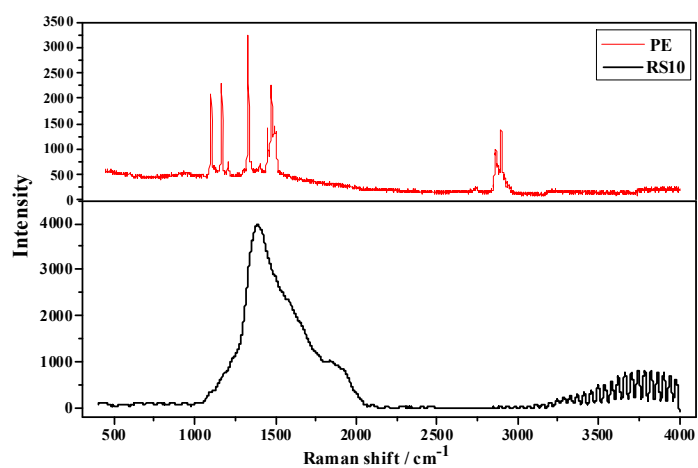

Sample RS10 was identified as PE

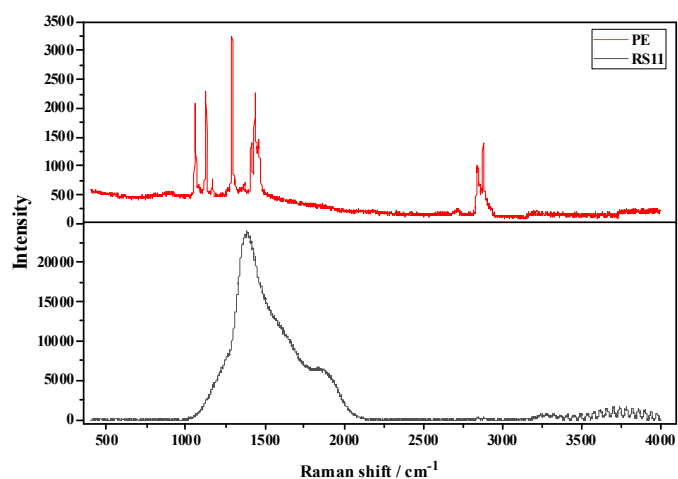

Sample RS11 was identified as PE

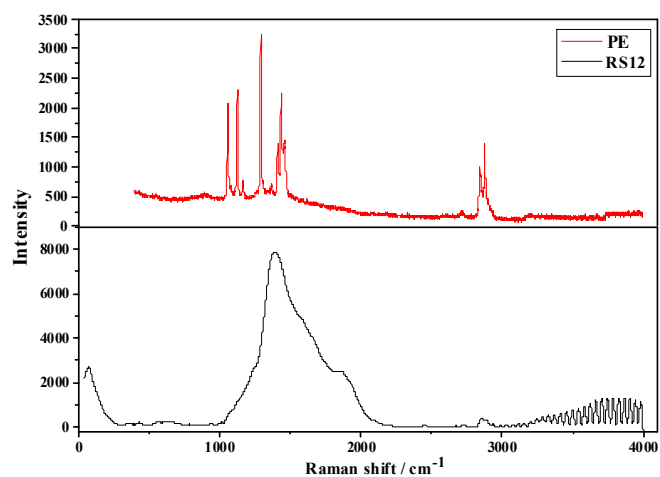

Sample RS12 was identified as PE

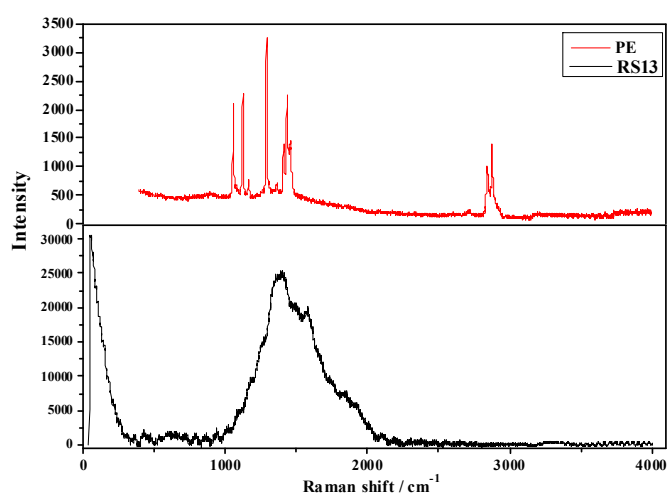

Sample RS13 was identified as PE

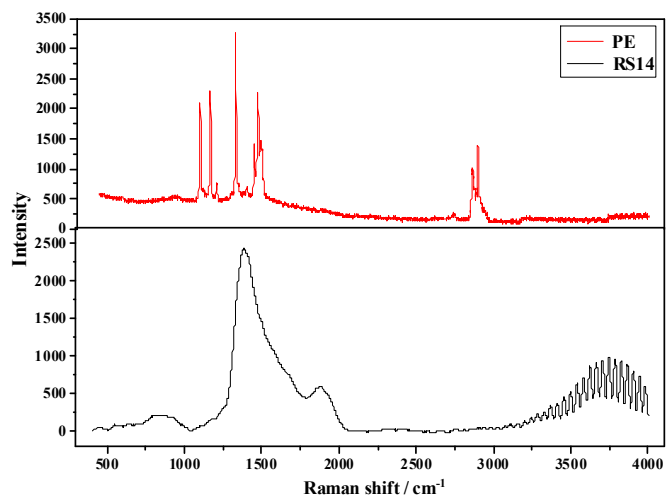

Sample RS14 was identified as PE

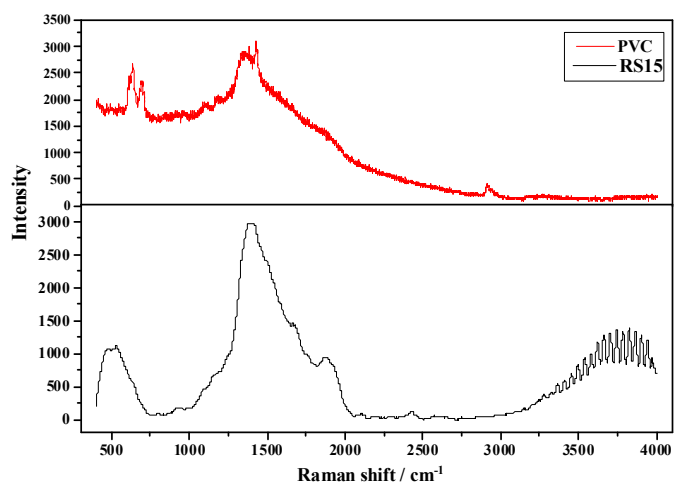

Sample RS15 was identified as PVC

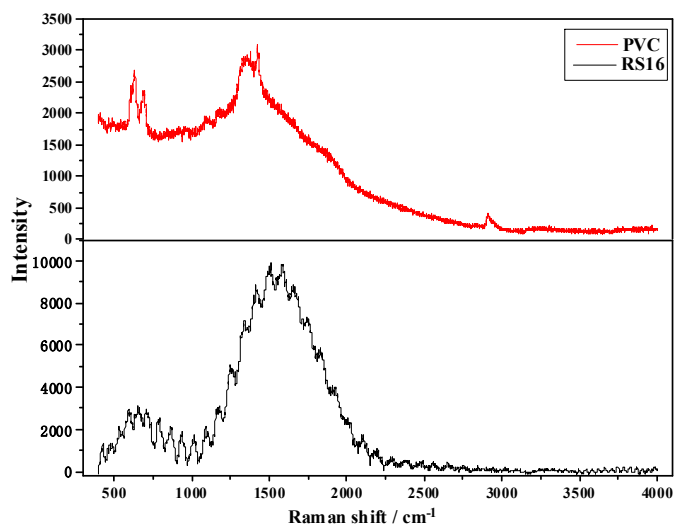

Sample RS16 was identified as PVC

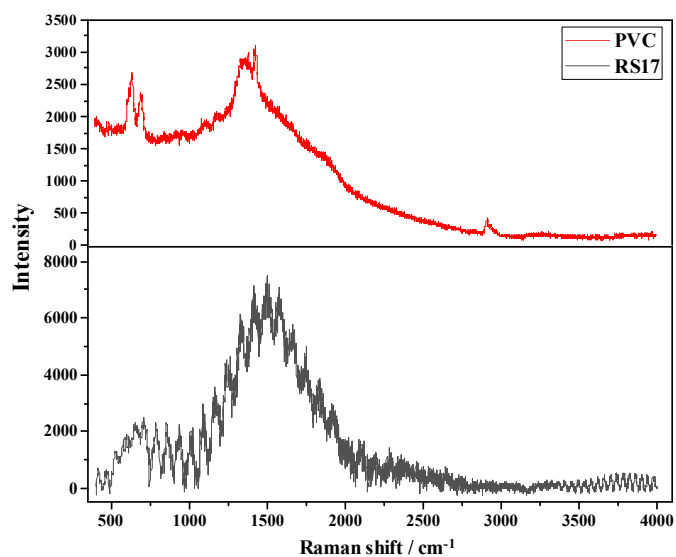

Sample RS17 was identified as PVC

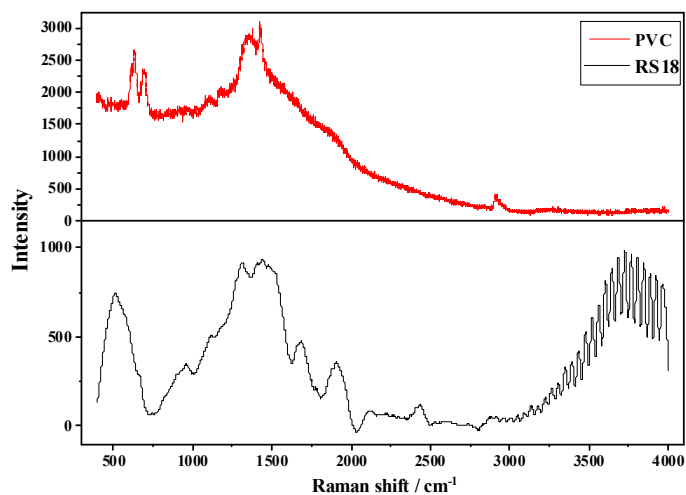

Sample RS18 was identified as PVC

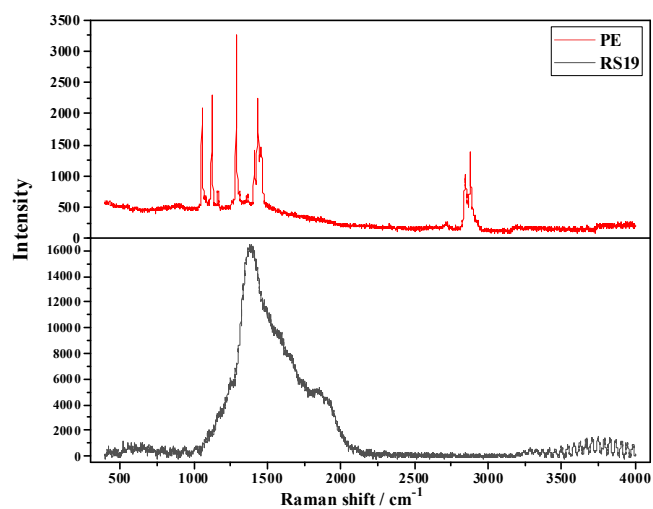

Sample RS19 was identified as PVC

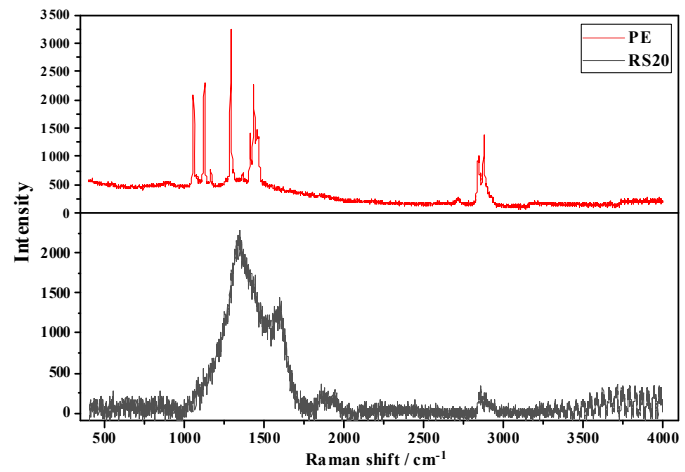

Sample RS20 was identified as PVC

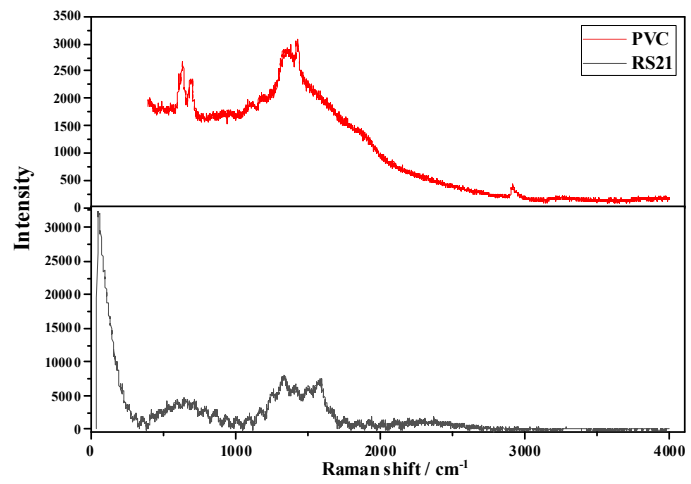

Sample RS21 was identified as PVC

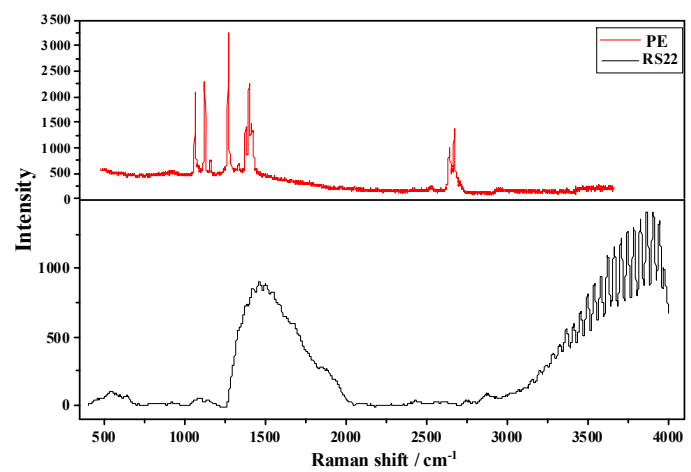

Sample RS22 was identified as PVC

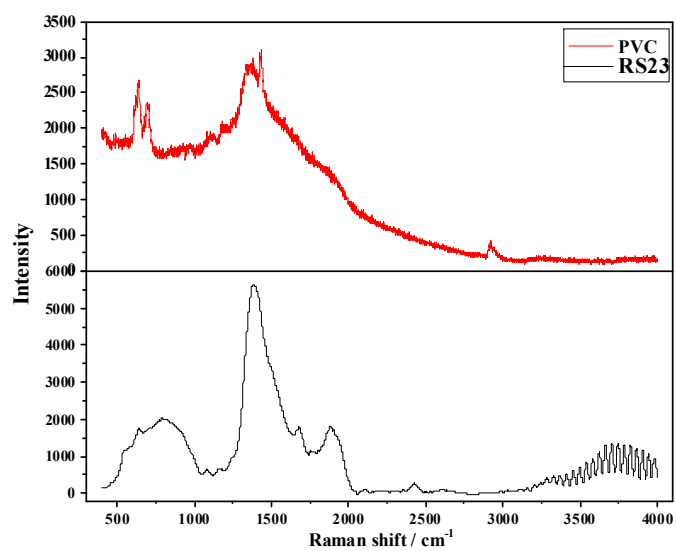

Sample RS23 was identified as PVC

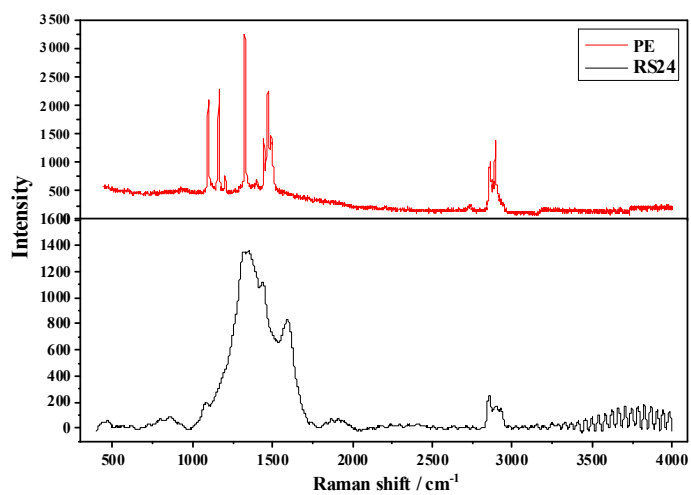

Sample RS24 was identified as PE

**Table S1. The questionnaire information about sampling sites**

| Sampling sites | Latitude and longitude | Annual precipitation | Planting pattern | Soil texture | Irrigation method  | Crop type | Mulching time (years) | Mulch film amount (kg/year) | Abundance of PF(particles·kg-1) |
|----------------|------------------------|----------------------|------------------|--------------|--------------------|-----------|-----------------------|-----------------------------|---------------------------------|
| S1             | 104.3937, 29.3846      | 1108.8               | Garden           | Clay         | Without irrigation | Corn      | 10-20years            | 2.5                         | 500                             |
| S2             | 104.5278, 29.3219      | 1108.8               | Garden           | Loam         | Furrow irrigation  | Corn      | 10-21years            | 12                          | 167                             |
| S3             | 104.4233, 29.3742      | 1108.8               | Garden           | Loam         | Without irrigation | Vegetable | 10-22years            | 7                           | 1158                            |
| S4             | 104.4525, 29.2551      | 1108.8               | Garden           | Sandy soil   | Without irrigation | Peanut    | More than 20 years    | 7.2                         | 350                             |
| S5             | 104.2842, 28.9213      | 1100                 | Garden           | Sandy soil   | Without irrigation | Peanut    | More than 21 years    | 5.5                         | 183                             |
| S6             | 104.2842, 28.9213      | 1100                 | Garden           | Sandy soil   | Without irrigation | Vegetable | More than 22 years    | 535                         | 158                             |
| S7             | 104.2928, 28.9821      | 1100                 | Garden           | Sandy soil   | Furrow irrigation  | Vegetable | 10-20years            | 400                         | 217                             |
| S8             | 104.2751, 29.1925      | 1100                 | Garden           | Sandy soil   | Without irrigation | Corn      | More than 20 years    | 4                           | 300                             |
| S9             | 105.7222, 28.8570      | 1154.9               | Garden and field | Sandy soil   | Without irrigation | Vegetable | 5-10years             | 42                          | 108                             |
| S10            | 105.7252, 28.8312      | 1154.9               | Field            | Sandy soil   | Without irrigation | Vegetable | 10-20years            | 30                          | 50                              |
| S11            | 104.1085, 31.0057      | 980                  | Field            | Loam         | Furrow irrigation  | Vegetable | 10-20years            | 440                         | 192                             |

| Sampling sites | Latitude and longitude | Annual precipitation | Planting pattern | Soil texture | Irrigation method    | Crop type | Mulching time (years) | Mulch film amount (kg/year) | Abundance of PF(particles·kg-1) |
|----------------|------------------------|----------------------|------------------|--------------|----------------------|-----------|-----------------------|-----------------------------|---------------------------------|
| S12            | 104.0793,<br>30.9484   | 980                  | Field            | Loam         | Furrow irrigation    | Vegetable | The following 5 years | 490                         | 267                             |
| S13            | 102.2577,<br>26.7386   | 1200                 | Field            | Loam         | Furrow irrigation    | Tobacco   | The following 5 years | 75                          | 108                             |
| S14            | 102.4492,<br>26.7420   | 1200                 | Garden and field | Loam         | Furrow irrigation    | Tobacco   | More than 20 years    | 15                          | 208                             |
| S15            | 104.4148,<br>30.9342   | 1100                 | Garden           | Loam         | Without irrigation   | Vegetable | 10-20years            | 1800                        | 258                             |
| S16            | 104.7148,<br>30.6190   | 800                  | Garden           | Sandy soil   | Without irrigation   | Vegetable | The following 5 years | 2100                        | 167                             |
| S17            | 106.5350,<br>30.6129   | 1010                 | Garden and field | Loam         | Furrow irrigation    | Vegetable | The following 5 years | 1000                        | 225                             |
| S18            | 106.5540,<br>30.6222   | 1010                 | Garden           | Loam         | Furrow irrigation    | Corn      | The following 5 years | 0                           | 92                              |
| S19            | 106.6586,<br>30.5989   | 1080                 | Garden           | Loam         | Sprinkler irrigation | Vegetable | 5-10years             | 588                         | 258                             |
| S20            | 106.6651,<br>30.5935   | 1473.5               | Garden           | Loam         | Sprinkler irrigation | Corn      | 5-10years             | 0                           | 208                             |

**Table S2. The differences in the abundance of PF in different sampling sites**

| <b>Sampling sites</b> | <b>Mean value</b> | <b>5% significant level</b> | <b>1% significant level</b> |
|-----------------------|-------------------|-----------------------------|-----------------------------|
| S1                    | 500.00            | a                           | A                           |
| S2                    | 166.67            | b                           | B                           |
| S3                    | 1158.33           | c                           | C                           |
| S4                    | 350.00            | d                           | D                           |
| S5                    | 183.33            | de                          | DE                          |
| S6                    | 158.33            | ef                          | DEF                         |
| S7                    | 216.67            | ef                          | DEF                         |
| S8                    | 300.00            | fg                          | EFG                         |
| S9                    | 108.33            | gh                          | FG                          |
| S10                   | 50.00             | gh                          | GH                          |
| S11                   | 191.67            | gh                          | GH                          |
| S12                   | 266.67            | ghi                         | GHI                         |
| S13                   | 108.33            | hi                          | GHI                         |
| S14                   | 208.33            | i                           | HI                          |
| S15                   | 258.33            | i                           | HI                          |
| S16                   | 166.67            | i                           | I                           |
| S17                   | 225.00            | j                           | J                           |
| S18                   | 91.67             | j                           | J                           |
| S19                   | 258.33            | j                           | JK                          |
| S20                   | 208.33            | k                           | K                           |

**Table S3. Selection of representative samples in sampling sites**

| Sampling site | Representative Sample |
|---------------|-----------------------|
| S1            | RS1                   |
| S2            | RS4                   |
| S3            | RS5                   |
| S4            | RS16                  |
| S5            | RS20                  |
| S7            | RS19                  |
| S9            | RS23                  |
| S10           | RS21                  |
| S11           | RS10、RS13             |
| S12           | RS3、RS12              |
| S13           | RS22                  |
| S14           | RS24                  |
| S15           | RS8、RS9               |
| S16           | RS2、RS18              |
| S17           | RS6、RS7               |
| S18           | RS11、RS17             |
| S19           | RS14                  |
| S20           | RS15                  |

**File S1. The code of “forestplot” package in R ver 3.5.1.**

```
library(randomForest)

library(rfPermute)
#library(rfUtilities)

getwd
setwd("C:/Users/Administrator/Desktop")

frichness = read.table("Random1.txt", header=T, row.names= 1, sep="\t")

set.seed(1234)

frichness.rfP <- rfPermute(residue~ ., data = frichness, ntree = 5000, na.action = na.omit,
nrep = 50, num.cores = 1)

imp <- data.frame(round(importance(frichness.rfP),2))# View the result

imp <- imp[order(imp$MeanDecreaseAccuracy, decreasing = TRUE), ]# Put the results in
order.

imp_data <-as.data.frame(imp[2:11,])
```
